# Supplementary material for: Diagnostic Potential of Exosomal microRNAs in Colorectal Cancer
Source: MDPI journal article supplement (doi:10.3390/diagnostics12061413), 2022-06-08
Supplement: s1 [file s1]

**Table S1:** Characteristics of chosen miRNA.

| miRN<br>A | Biological Role                                                                   | Targeted Genes                       | Correlation of Expression in CRC                                                                            |
|-----------|-----------------------------------------------------------------------------------|--------------------------------------|-------------------------------------------------------------------------------------------------------------|
| Let7      | tumor suppression                                                                 | HMGA2, KRAS, c-MYC,                  | higher expression was associated with higher CRC-specific mortality                                         |
| mir16     | tumor suppression                                                                 | cox-2, zyxin                         | low expression associated with poor survival of CRC patients                                                |
| mir19     | cell survival, proliferation, differentiation and angiogenesis                    | TG2                                  | high expression associated with poorer survival                                                             |
| mir21     | cellular proliferation and differentiation                                        | PDCD4, NFIB, SPRY2                   | associated with poor survival and response to chemotherapy                                                  |
| mir23     |                                                                                   |                                      | Increased expression associated with liver metastasis                                                       |
| mir29     | cell proliferation, cell cycle, cell senescence, differentiation, and apoptosis   | CDK6, MCL1, BCR/ABL1                 | correlated with a poor prognosis in patients with CRC                                                       |
| mir34     | tumor suppression                                                                 | p53                                  | increased expression associated with poor cancer-specific mortality                                         |
| mir92     | cell proliferation, suppress apoptosis of cancer cells, induce tumor angiogenesis | integrin $\alpha$ 5, E-cadherin, Bim | high expression in CRC patients was associated with poor survival                                           |
| mir222    |                                                                                   | PTEN, p57Kip2, PDLIM2                | correlated with liver metastasis, distant metastasis and shorter overall survival rate of patients with CRC |
| mir451    | tumor suppression                                                                 | MIF, IL6R, Ywhaz                     | downregulation correlated with cancer persistence or recurrence after surgery                               |

**Table S2.** Characteristics of chosen primers (*all* Qiagen GmbH, Hilden, Germany).

| miScript Primer Assay | miR Base     | miRNA Sequence             |
|-----------------------|--------------|----------------------------|
| Hs_miR-23a_2          | MIMAT0000078 | 5'AUCACAUUGCCAGGGAUUUUCC   |
| Hs_miR-451_1          | MIMAT0001631 | 5'AAACCGUUACCAUUAUCUGAGUU  |
| Hs_miR-34a*_1         | MIMAT0004557 | 5'CAAUCAGCAAGUAUACUGCCCU   |
| Ce_miR-39_1           | MIMAT0000010 | 5'UCACCGGGUGUAAAUCAGCUUG   |
| Hs_miR-92_1           | MIMAT0000092 | 5'UAUUGCACUUGUCCCCGGCCUGU  |
| Hs_miR-16_1           | MIMAT0000069 | 5'UAGCAGCACGUAAAUAUUGGCG   |
| Hs_miR-21_2           | MIMAT0000076 | 5'UAGCUUAUCAGACUGAUGUUGA   |
| Hs_let-7c_1           | MIMAT0000064 | 5'UGAGGUAGUAGGUUGUAUGGUU   |
| Hs_miR-222_2          | MIMAT0000279 | 5'AGCUACAUCUGGCUACUGGGU    |
| Hs_miR-19a_1          | MIMAT0000073 | 5'UGUGCAAUUCUAUGC AAAACUGA |
| Hs_miR-29a_1          | MIMAT0000086 | 5'UAGCACCAUCUGAAAUCGGUUA   |
| Hs_SNORD43_11         | MS00007476   | 5'CACAGATGATGAACTTATTGAC   |

**Table S3.** Median levels of Cel-miR-39 with standard deviations.

| Cel-miR-39 | Healthy          | Adenoma          | CRC              |
|------------|------------------|------------------|------------------|
| exosomes   | 15.23 $\pm$ 2.14 | 13.46 $\pm$ 3.17 | 13.89 $\pm$ 1.87 |
| serum      | 28.87 $\pm$ 2.87 | 25.45 $\pm$ 2.34 | 27.51 $\pm$ 3.33 |

**Table S4.** Details of median-normalized miRNA values in the exosomal compartment, shown in Figure 2.

| miRNA         | Diagnosis | Patients | Outliers | min.  | 25% Quant. | Median | 75% Quant. | Max   | mean  | Standard Deviation | Standard Error |
|---------------|-----------|----------|----------|-------|------------|--------|------------|-------|-------|--------------------|----------------|
| <b>Let7</b>   | healthy   | 26       | 0        | -7.33 | -4.19      | -2.75  | -1.51      | -0.10 | -2.87 | 1.67               | 0.33           |
|               | adenoma   | 19       | 1        | -3.82 | -2.33      | -1.87  | -0.88      | 0.59  | -1.66 | 1.26               | 0.30           |
|               | CRC       | 22       | 1        | -4.50 | -2.50      | -2.19  | -1.34      | -0.19 | -2.01 | 1.03               | 0.22           |
| <b>mir16</b>  | healthy   | 26       | 0        | -6.33 | -3.81      | -2.26  | -0.93      | 0.78  | -2.53 | 1.96               | 0.38           |
|               | adenoma   | 20       | 0        | -6.41 | -3.52      | -2.69  | -0.20      | 1.53  | -1.90 | 2.23               | 0.50           |
|               | CRC       | 23       | 0        | -4.79 | -2.02      | -1.56  | -0.68      | 2.79  | -1.36 | 1.48               | 0.31           |
| <b>mir19</b>  | healthy   | 26       | 0        | -7.54 | -5.63      | -4.49  | -3.57      | -0.74 | -4.44 | 1.85               | 0.36           |
|               | adenoma   | 20       | 0        | -6.32 | -4.70      | -3.81  | -2.37      | 0.01  | -3.51 | 1.84               | 0.41           |
|               | CRC       | 23       | 0        | -6.83 | -4.71      | -4.26  | -2.80      | 0.62  | -3.77 | 1.56               | 0.33           |
| <b>mir21</b>  | healthy   | 26       | 0        | -8.27 | -6.15      | -5.02  | -3.66      | -0.85 | -4.81 | 1.75               | 0.34           |
|               | adenoma   | 20       | 0        | -8.52 | -3.48      | -2.75  | -2.31      | -0.69 | -3.17 | 1.98               | 0.44           |
|               | CRC       | 23       | 0        | -7.88 | -6.25      | -4.35  | -2.34      | 0.73  | -4.36 | 2.30               | 0.48           |
| <b>mir23</b>  | healthy   | 26       | 0        | -7.44 | -6.13      | -4.44  | -3.32      | 0.02  | -4.39 | 2.12               | 0.42           |
|               | adenoma   | 20       | 0        | -9.52 | -3.36      | -2.72  | -1.36      | 0.34  | -2.79 | 2.43               | 0.54           |
|               | CRC       | 23       | 0        | -6.67 | -4.29      | -3.46  | -2.42      | 1.49  | -3.22 | 1.71               | 0.36           |
| <b>mir29</b>  | healthy   | 26       | 0        | -6.24 | -4.72      | -3.54  | -2.22      | 0.03  | -3.36 | 1.78               | 0.35           |
|               | adenoma   | 19       | 1        | -4.96 | -2.48      | -1.72  | -1.08      | 0.91  | -1.83 | 1.63               | 0.38           |
|               | CRC       | 23       | 0        | -5.03 | -3.51      | -2.88  | -1.61      | 1.84  | -2.52 | 1.50               | 0.31           |
| <b>mir34</b>  | healthy   | 26       | 0        | -7.19 | -5.86      | -5.33  | -3.78      | -1.22 | -4.73 | 1.67               | 0.33           |
|               | adenoma   | 20       | 0        | -8.54 | -4.69      | -3.85  | -2.77      | 0.94  | -3.94 | 2.30               | 0.51           |
|               | CRC       | 22       | 1        | -7.11 | -5.64      | -4.84  | -3.23      | -1.10 | -4.60 | 1.60               | 0.35           |
| <b>mir92</b>  | healthy   | 26       | 0        | -7.42 | -5.09      | -3.80  | -2.47      | -0.09 | -3.67 | 1.81               | 0.35           |
|               | adenoma   | 20       | 0        | -8.02 | -3.57      | -2.71  | -1.14      | 1.54  | -2.60 | 2.29               | 0.51           |
|               | CRC       | 23       | 0        | -5.48 | -3.91      | -3.07  | -1.57      | 2.01  | -2.72 | 1.69               | 0.35           |
| <b>mir222</b> | healthy   | 26       | 0        | -7.34 | -5.95      | -5.01  | -4.10      | -1.09 | -4.77 | 1.66               | 0.33           |
|               | adenoma   | 20       | 0        | -8.06 | -4.04      | -3.04  | -2.29      | -0.38 | -3.29 | 1.93               | 0.43           |
|               | CRC       | 23       | 0        | -6.87 | -5.13      | -4.58  | -2.85      | 0.66  | -3.99 | 1.67               | 0.35           |
| <b>mir451</b> | healthy   | 26       | 0        | -5.79 | -3.15      | -2.49  | -1.06      | 0.92  | -2.23 | 1.73               | 0.34           |
|               | adenoma   | 20       | 0        | -7.06 | -3.46      | -2.79  | 0.45       | 1.78  | -1.82 | 2.34               | 0.52           |
|               | CRC       | 23       | 0        | -4.01 | -2.27      | -1.90  | -0.40      | 2.98  | -1.37 | 1.55               | 0.32           |

**Table S5.** Areas under the curve (AUC) and sensitivities (SN) at 95% specificity (SP) for the different miRNAs in the exosomal compartment. Comparisons of healthy and non-healthy (adenoma or CRC) patients were made.  $p$ -value of Let7 = 0.009, of mir16 = 0.061 and of mir23 = 0.012.

| miRNA         | Healthy vs. Non-Healthy (Adenoma or CRC) |          |
|---------------|------------------------------------------|----------|
|               | AUC                                      | SN@95%SP |
| <b>Let7</b>   | 0.67                                     | 38.5%    |
| <b>mir16</b>  | 0.62                                     | 23.1%    |
| <b>mir19</b>  | 0.61                                     | 23.1%    |
| <b>mir21</b>  | 0.65                                     | 3.8%     |
| <b>mir23</b>  | 0.69                                     | 34.6%    |
| <b>mir29</b>  | 0.68                                     | 26.9%    |
| <b>mir34</b>  | 0.59                                     | 3.8%     |
| <b>mir92</b>  | 0.65                                     | 11.5%    |
| <b>mir222</b> | 0.68                                     | 15.4%    |
| <b>mir451</b> | 0.59                                     | 23.1%    |

**Table S6.** Median-normalized miRNA values in serum. Comparisons of different diagnoses (healthy controls, adenoma patients, carcinoma patients) were made. Differences are shown as *p*-values. *p*-values of < 0.05 (highlighted with \*) were considered to be statistically significant.

| miRNA  | Healthy vs. Adenoma | Healthy vs. CRC | Adenoma vs. CRC |
|--------|---------------------|-----------------|-----------------|
| Let7   | <0.001 *            | 0.296           | 0.005 *         |
| mir16  | <0.001 *            | 0.533           | <0.001 *        |
| mir19  | <0.001 *            | 0.193           | 0.056           |
| mir21  | <0.001 *            | 0.619           | <0.001 *        |
| mir23  | <0.001 *            | 0.541           | <0.001 *        |
| mir29  | <0.001 *            | 0.742           | <0.001 *        |
| mir34  | <0.001 *            | 0.289           | 0.013 *         |
| mir92  | <0.001 *            | 0.275           | 0.002 *         |
| mir222 | 0.017 *             | 0.310           | 0.241           |
| mir451 | <0.001 *            | 0.173           | 0.010 *         |

**Table S7.** Details of median-normalized miRNA values in serum.

| miRNA  | Diagnosis | Patients | Outliers | min.   | 25% Quant. | Median | 75% Quant. | max   | mean  | Standard Deviation | Standard Error |
|--------|-----------|----------|----------|--------|------------|--------|------------|-------|-------|--------------------|----------------|
| Let7   | healthy   | 26       | 0        | -7.51  | -1.57      | -0.27  | 2.04       | 4.89  | -0.13 | 2.98               | 0.58           |
|        | adenoma   | 20       | 0        | 0.03   | 1.67       | 3.17   | 5.08       | 6.22  | 3.30  | 1.95               | 0.44           |
|        | CRC       | 23       | 0        | -4.33  | -2.02      | 0.94   | 4.07       | 5.97  | 0.84  | 3.40               | 0.71           |
| mir16  | healthy   | 26       | 0        | -2.81  | 3.82       | 4.66   | 5.68       | 10.26 | 4.89  | 2.78               | 0.55           |
|        | adenoma   | 20       | 0        | 5.25   | 7.37       | 8.69   | 9.86       | 11.30 | 8.59  | 1.81               | 0.40           |
|        | CRC       | 23       | 0        | 1.06   | 2.51       | 4.61   | 8.61       | 10.65 | 5.46  | 3.47               | 0.72           |
| mir19  | healthy   | 25       | 1        | -11.10 | 0.92       | 2.16   | 3.34       | 5.67  | 1.14  | 4.20               | 0.86           |
|        | adenoma   | 19       | 0        | -3.11  | 3.33       | 5.88   | 7.43       | 11.41 | 5.41  | 3.56               | 0.82           |
|        | CRC       | 23       | 0        | -5.11  | 0.45       | 1.72   | 6.17       | 11.18 | 2.87  | 4.80               | 1.00           |
| mir21  | healthy   | 26       | 0        | -3.37  | 1.85       | 3.37   | 4.73       | 7.95  | 3.38  | 2.55               | 0.50           |
|        | adenoma   | 20       | 0        | 2.68   | 5.55       | 8.70   | 9.54       | 11.87 | 7.74  | 2.55               | 0.57           |
|        | CRC       | 23       | 0        | -2.29  | 0.47       | 3.53   | 7.00       | 11.38 | 3.90  | 4.31               | 0.90           |
| mir23  | healthy   | 26       | 0        | -3.44  | 3.38       | 4.41   | 5.97       | 12.60 | 4.53  | 3.14               | 0.62           |
|        | adenoma   | 20       | 0        | 4.00   | 6.35       | 8.68   | 10.73      | 12.80 | 8.72  | 2.83               | 0.63           |
|        | CRC       | 23       | 0        | -6.74  | -0.50      | 2.92   | 8.47       | 12.92 | 3.73  | 5.48               | 1.14           |
| mir29  | healthy   | 25       | 1        | -0.94  | 0.29       | 1.30   | 1.95       | 4.79  | 1.45  | 1.71               | 0.35           |
|        | adenoma   | 20       | 0        | 1.00   | 2.68       | 4.26   | 5.89       | 8.25  | 4.47  | 2.36               | 0.53           |
|        | CRC       | 23       | 0        | -2.48  | -0.97      | 0.37   | 3.47       | 7.62  | 1.22  | 2.91               | 0.61           |
| mir34  | healthy   | 26       | 0        | -10.32 | -6.56      | -4.73  | -2.92      | -1.20 | -4.73 | 2.28               | 0.45           |
|        | adenoma   | 20       | 0        | -3.78  | -2.59      | -1.45  | -0.25      | 3.96  | -0.95 | 2.35               | 0.53           |
|        | CRC       | 23       | 0        | -7.75  | -6.68      | -6.07  | -1.68      | 3.81  | -3.66 | 4.27               | 0.89           |
| mir92  | healthy   | 26       | 0        | -7.54  | -1.54      | -0.01  | 1.71       | 4.77  | 0.04  | 2.57               | 0.50           |
|        | adenoma   | 20       | 0        | 0.24   | 2.04       | 3.38   | 4.88       | 6.26  | 3.54  | 1.79               | 0.40           |
|        | CRC       | 23       | 0        | -2.89  | -1.57      | -0.63  | 3.46       | 6.25  | 0.95  | 3.15               | 0.66           |
| mir222 | healthy   | 26       | 0        | -7.57  | -1.98      | -0.40  | 0.65       | 4.76  | -0.44 | 2.44               | 0.48           |
|        | adenoma   | 20       | 0        | -1.89  | -0.23      | 0.90   | 2.83       | 6.25  | 1.46  | 2.63               | 0.59           |
|        | CRC       | 23       | 0        | -3.32  | -1.77      | -0.69  | 2.29       | 6.59  | 0.40  | 3.19               | 0.67           |
| mir451 | healthy   | 25       | 0        | -3.54  | 4.49       | 5.86   | 7.76       | 12.38 | 6.04  | 3.55               | 0.71           |
|        | adenoma   | 16       | 0        | 5.98   | 9.51       | 12.04  | 13.35      | 17.36 | 11.48 | 3.39               | 0.85           |
|        | CRC       | 23       | 0        | 1.06   | 4.39       | 6.19   | 10.84      | 16.65 | 7.80  | 5.04               | 1.05           |

**Table S8.** Details for tumor markers CEA and CA 19-9.

| Marker | Diagnosis | Patients | Min. | 25%<br>Quant. | Median | 75%<br>Quant. | Max. | Mean | Standard<br>Deviation | Standard<br>Error |
|--------|-----------|----------|------|---------------|--------|---------------|------|------|-----------------------|-------------------|
| CEA    | healthy   | 24       | 0.00 | 0.00          | 0.35   | 1.10          | 4.08 | 0.76 | 1.07                  | 0.22              |
|        | adenoma   | 17       | 0.00 | 0.00          | 1.10   | 2.35          | 4.53 | 1.40 | 1.40                  | 0.34              |
|        | CRC       | 22       | 0.00 | 0.69          | 1.10   | 1.61          | 3.40 | 1.24 | 0.88                  | 0.19              |
| CA19-9 | healthy   | 24       | 0.00 | 0.69          | 1.70   | 2.97          | 5.36 | 1.87 | 1.51                  | 0.31              |
|        | adenoma   | 16       | 0.00 | 1.52          | 2.77   | 3.30          | 5.17 | 2.50 | 1.42                  | 0.35              |
|        | CRC       | 21       | 0.00 | 2.40          | 2.64   | 3.09          | 5.46 | 2.73 | 1.16                  | 0.25              |
